# Supplementary material
Source: Research Square preprint supplement (doi:10.21203/rs.3.rs-9873170/v1)
Supplement: Supplementary file 1 [file 69363eb03d5890d196ca5589.docx]

Extended Data

Tables

Extended Data Table 1. Clinical and pathological characteristics of monozygotic twin pairs with discordant IgA nephropathy phenotypes.

Extended Data Table 2. Isolation and culture of fecal bacteria from the Twin 3-1 IgA nephropathy patient.

Extended Data Table 3. Comparative 16S rRNA sequence analysis.

**Extended Data Table 4. Altered schaedler flora core microbiota used for colonizing germ-free mice.**

Extended Data Table 5. The clinical and pathological characteristics of the IgA nephropathy patients and healthy controls enrolled in this study.

Extended Data Table 6. Primers used in this study.

Figures

Extended Data Fig. 1| Pairwise comparison of microbial composition for each twin pair.

Extended Data Fig. 2| Pairwise comparison of relative abundance of the differentially distributed genus between each twin pair.

Extended Data Fig. 3| Transplantation of fecal sample with high abundance *A. muciniphila* induces IgA kidney deposition.

Extended Data Fig. 4| The isolation and colonization of patient-derived *A. muciniphila*.

Extended Data Fig. 5| Patient-isolated *A. muciniphila* promotes IgA renal deposition byinducing Akkermansia-mesangial cell cross-reactive IgA response.

Extended Data Fig. 6| Structural simulation screening process for *A. muciniphila* and mesangial proteins.

Extended Data Fig. 7| The structural alignments of the 11 high-confidence mimicry pairs.

Extended Data Fig. 8| Associations between anti-Q9UBV2, anti-Q14444, and anti-P23634 IgA and clinical-pathological phenotypes.

Extended Data Fig. 9| The IgA antibody titers against the immunized proteins.

Extended Data Fig. 10| Isolation of two *A. muciniphila*-specific lytic bacteriophages from environmental sources.

Extended Data Fig. 11| Phage treatment ameliorated the IgAN phenotypes induced by *A. muciniphila* in LCWE stimulated humanized IgA1 mouse model.

Extended Data Fig. 12| Phage treatment ameliorated the IgAN phenotypes induced by *A. muciniphila* in LCWE stimulated humanized IgA1 mouse model.

Extended Data Table 1. Clinical and pathological characteristics of monozygotic twin pairs with discordant IgA nephropathy phenotypes.

| **Twin Pair** | **Diagnosis** | **Sex** | **Age (years)** | **Serum creatinine (μmol/L)** | **eGFR**  **(ml/min/1.73m3** | **Hematuria** | **Proteinuria (g/24h)** | **MEST-C** |
| --- | --- | --- | --- | --- | --- | --- | --- | --- |
| Twin1-1 | Severe IgAN | F | 15 | 94 | 78.18 | +++ | 1.80 | M0E1S0T0C2 |
| Twin1-2 | Mild IgAN | F | 15 | 67.1 | 117.51 | ++ | 0.03 | M0E0S0T0C0 |
| Twin2-1 | Severe IgAN | M | 21 | 1046.76 | 5.396 | ++ | 2.39 | M1E0S1T2C1 |
| Twin2-2 | Mild IgAN | M | 21 | 77.08 | 123.255 | ++ | 0.57 | M1E0S0T0C0 |
| Twin3-1 | IgAN | M | 36 | 208.57 | 33.201 | +++ | 12.60 | M0E1S0T1C2 |
| Twin3-2 | Healthy control | M | 36 | NA | NA | NA | NA | NA |
| Twin4-1 | IgAN | M | 50 | 134 | 51.737 | +++ | 3.68 | M1E0S0T1C0 |
| Twin4-2 | Healthy control | M | 50 | NA | NA | NA | NA | NA |
| Twin5-1 | IgAN | F | 67 | 44.9 | 99.95 | + | 5.93 | NA |
| Twin5-2 | Healthy control | F | 67 | NA | NA | NA | NA | NA |

Note: NA, not applicable.

**Extended Data Table 2. Isolation and culture of fecal bacteria from the Twin 3-1 IgA nephropathy patient.**

| **ID** | **Species** |
| --- | --- |
| BHI-1 | *Bacillus licheniformis* strain DSM 13 |
| BHI-2 | *Escherichia fergusonii* strain NBRC 102419 |
| BHI-3 | *Bacteroides stercoris* ATCC 43183 |
| BHI-4 | *Shigella sonnei strain* CECT 4887 |
| BHI-5 | *Hungatella hathewayi* strain 1313 |
| BHI-6 | *Escherichia fergusonii* ATCC 35469 |
| BHI-7 | *Megasphaera indica* strain NMBHI-10 |
| BHI-8 | *Bifidobacterium faecale* strain CU3-7 |
| BHI-9 | *Bacillus nealsonii* strain DSM 15077 |
| BHI-10 | *Collinsella aerofaciens* strain JCM 10188 |
| BHI-11 | *Bacteroides thetaiotaomicron* strain JCM 5827 |
| BHI-12 | *Bacteroides xylanisolvens* XB1A |
| BHI-13 | *Bacteroides uniformis* strain JCM 5828 |
| BHI-14 | *Bacteroides fragilis* strain NCTC 9343 |
| BHI-15 | *Lactobacillus mucosae* strain S32 |
| BHI-16 | *Ruthenibacterium lactatiformans* strain 585-1 |
| BHI-17 | *Enterococcus faecium* strain NBRC 100486 |
| BHI-18 | *Parabacteroides distasonis* ATCC 8503 |
| BHI-19 | *Bacteroides vulgatus* ATCC 8482 |
| BHI-20 | *Collinsella stercoris* strain JCM 10641 |
| BHI-21 | *Dialister succinatiphilus* YIT 11850 |
| BHI-22 | *Parasutterella excrementihominis* strain YIT 11859 |
| BHI-23 | *Blautia faecis* strain M25 |
| BHI-24 | *Alistipes shahii* WAL 8301 |
| BHI-25 | *Alistipes shahii* strain JCM 16773 |
| BHI-26 | *Alistipes onderdonkii* strain WAL 8169 |
| BHI-27 | *Proteiniphilum saccharofermentans* strain M3/6 |
| BHI-28 | *Butyricimonas paravirosa* strain 214-4 |
| BHI-29 | *Akkermansia muciniphila* |
| M9-1 | *Parasutterella excrementihominis* strain YIT 11859 |
| M9-2 | *Megasphaera indica* strain NMBHI-10 |
| M9-3 | *Collinsella aerofaciens* strain JCM 10188 |
| M9-4 | *Bacteroides thetaiotaomicron* strain VPI-5482 |
| M9-5 | *Enterococcus durans* strain 98D |
| M9-6 | *Bacteroides uniformis* strain JCM 5828 |
| M9-7 | *Bacteroides xylanisolvens* XB1A |
| M9-8 | *Parabacteroides distasonis* ATCC 8503 |
| M9-9 | *Lactobacillus mucosae* strain S32 |
| M9-10 | *Ruthenibacterium lactatiformans* strain 585-1 |
| M9-11 | *Dialister succinatiphilus* YIT 11850 |
| M9-12 | *Bacteroides stercoris* ATCC 43183 |
| M9-13 | *Bacteroides fragilis* strain NCTC 9343 |
| M9-14 | *Blautia glucerasea* strain JCM 17039 |
| M9-15 | *Collinsella stercoris* strain JCM 10641 |
| M9-16 | *Dorea longicatena* strain 111-35 |
| M9-17 | *Bacteroides koreensis* strain YS-aM39 |

**Extended Data Table 3. Comparative 16S rRNA sequence analysis.**

| **Description** | **Scientific Name** | **Max Score** | **Total Score** | **Per. Ident** | **Acc. Len** | **Accession** |
| --- | --- | --- | --- | --- | --- | --- |
| Akkermansia muciniphila ATCC BAA-835 16S ribosomal RNA, partial sequence | Akkermansia muciniphila | 2503 | 2503 | 98.79% | 1505 | NR 074436.1 |
| Akkermansia muciniphila ATCC BAA-835 STRAIN Muc 16S ribosomal RNA, partial sequence | Akkermansia muciniphila ATCC BAA-835 | 2492 | 2492 | 98.65% | 1433 | NR 042817.1 |

Note: The identity of the isolated strain to *A. muciniphila* ATCC BAA-835 reference strain is 98.79%.

**Extended Data Table 4. Altered schaedler flora core microbiota used for colonizing germ-free mice.**

| **Strains** | **Volume** | **The viable cell count at OD600 (CFU/mL)** |
| --- | --- | --- |
| *Bacteroides thetaiotaomicron* | 0.1 mL | 5×109 |
| *Bifidobacterium adolescentis* | 0.3 mL | 1×109 |
| *Collinsella aerofaciens* | 0.3 mL | 1×109 |
| *Desulfovibrio piger* | 0.3 mL | 1×109 |
| *Eubacterium plautii* | 0.6 mL | 5×108 |
| *Prevotella copri* | 0.6 mL | 5×108 |
| *Roseburia inulinivorans* | 0.3 mL | 1×109 |
| *Ruminococcus gnavus* | 0.3 mL | 1×109 |

**Extended Data Table 5. The clinical and pathological characteristics of the IgA nephropathy patients and healthy controls enrolled in this study.**

| **Characteristics of IgA nephropathy patients** | |
| --- | --- |
| Total number | 161 |
| Age, years | 35.58±10.37 |
| Male (%) | 91 (56.5%) |
| Proteinuria, g/d | 1.16 (0.61-2.39) |
| eGFR, ml/min/1.73 m2 | 68.00±34.36 |
| Serum creatinine, umol/L | 106.42 (79.30-162.27) |
| Serum IgA, g/L | 3.10±0.98 |
| Serum C3, g/L | 0.89±0.23 |
| Renal biopsy manifestation, n (%) |  |
| IgA deposition, 1/2/3/4+ | 1 (0.62%)/18(11.18%)/129 (80.12%)/12 (7.45%) |
| C3 deposition, 0/1/2/3+ | 3(1.86%)/16(9.94%)/64(39.75%)/78 (48.45%) |
| Mesangial hypercellularity (M1) | 103/159 (64.78%) |
| Endocapillary hypercellularity (E1) | 74/159 (46.54%) |
| Segmental glomerulosclerosis (S1) | 112/159 (70.44%) |
| Tubular atrophy/Interstitial fibrosis (T1/2) | 78/159 (49.06%) |
| Crescents (C1/2) | 78/103 (75.73%) |
| **Characteristics of healthy controls** | |
| Total number | 47 |
| Age, years | 36.23±12.53 |
| Male (%) | 23 (48.9%) |

**Extended Data Table 6. Primers used in this study.**

| **Primers** | **Sequence（5’-3’）** | **Gene/Bacteria** |
| --- | --- | --- |
| Bacteria Identification | | |
| 27-F | AGAGTTTGATCMTGGCTCAG | 16S rRNA full length |
| 1492-R | TACGGYTACCTTGTTACGACTT |
| AKK-F | CAGCACGTGAAGGTGGGGAC | *Akkermansia muciniphila*-specific gene |
| AKK-R | CCTTGCGGTTGGCTTCAGAT |
| In vivo colonization verification by RT-qPCR | | |
| 27-F | AGAGTTTGATCMTGGCTCAG | 16S rRNA |
| 342-R | CTGCTGCSYCCCGTAG |
| AKK-F | CAGCACGTGAAGGTGGGGAC | *Akkermansia muciniphila* |
| AKK-R | CCTTGCGGTTGGCTTCAGAT |
| Bvul-F | CGGGCTTAAATTGCAGATGA | *Bacteroides vulgatus* |
| Bvul-R | CATGCAGCACCTTCACAGAT |
| Bova-F | TGCAAACTRAAGATGGC | *Bacteroides ovatus* |
| Bova-R | CAAACTAATGGAACGCATC |

**
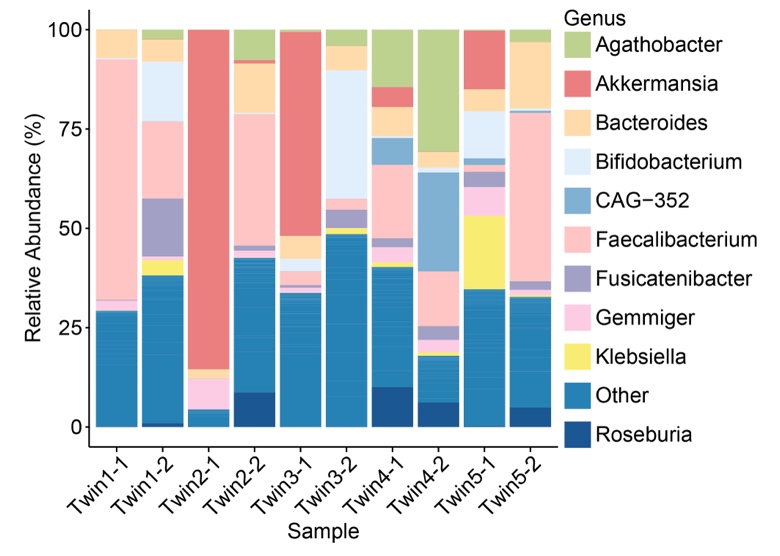
**

**Extended Data Fig. 1| Pairwise comparison of microbial composition for each twin pair.**

**
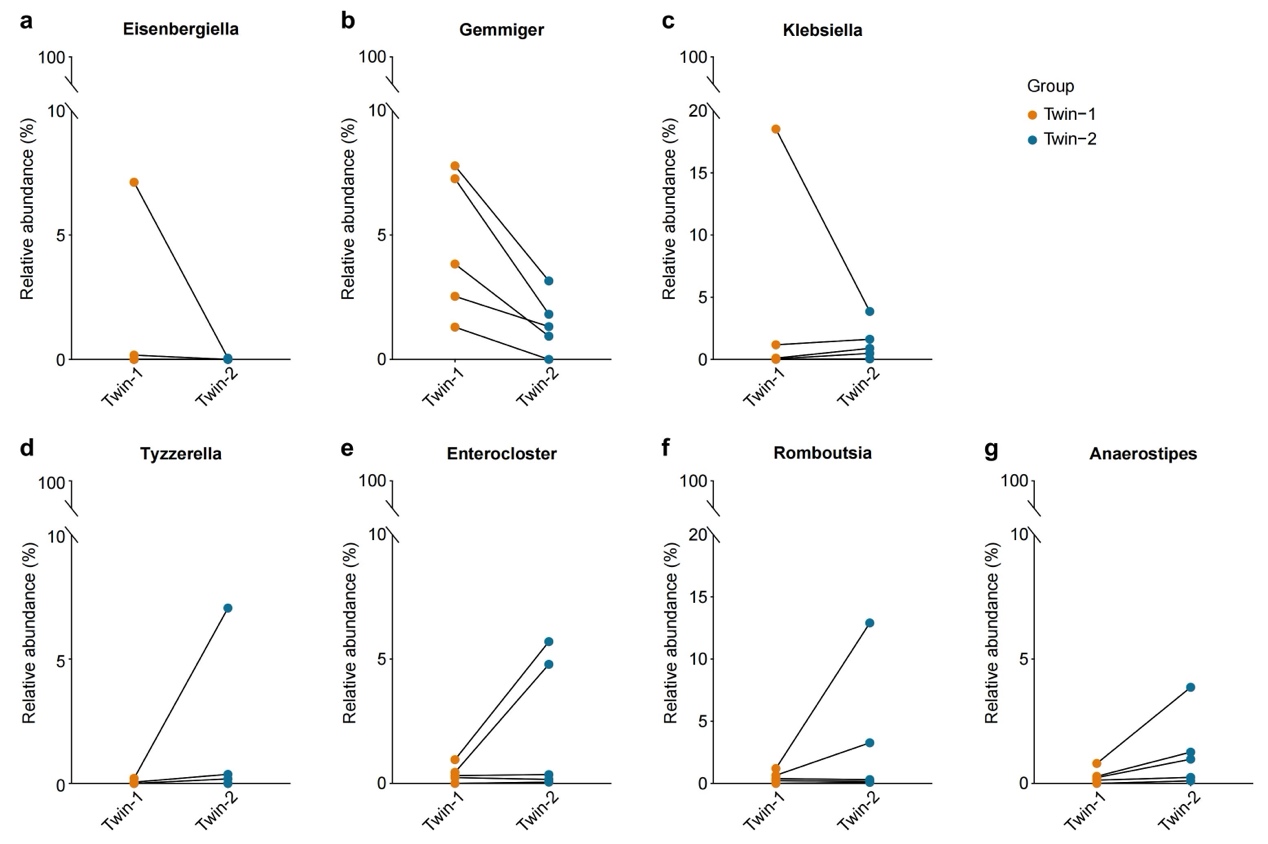
**

**Extended Data Fig. 2| Pairwise comparison of relative abundance of the differentially distributed genus between each twin pair.**

**
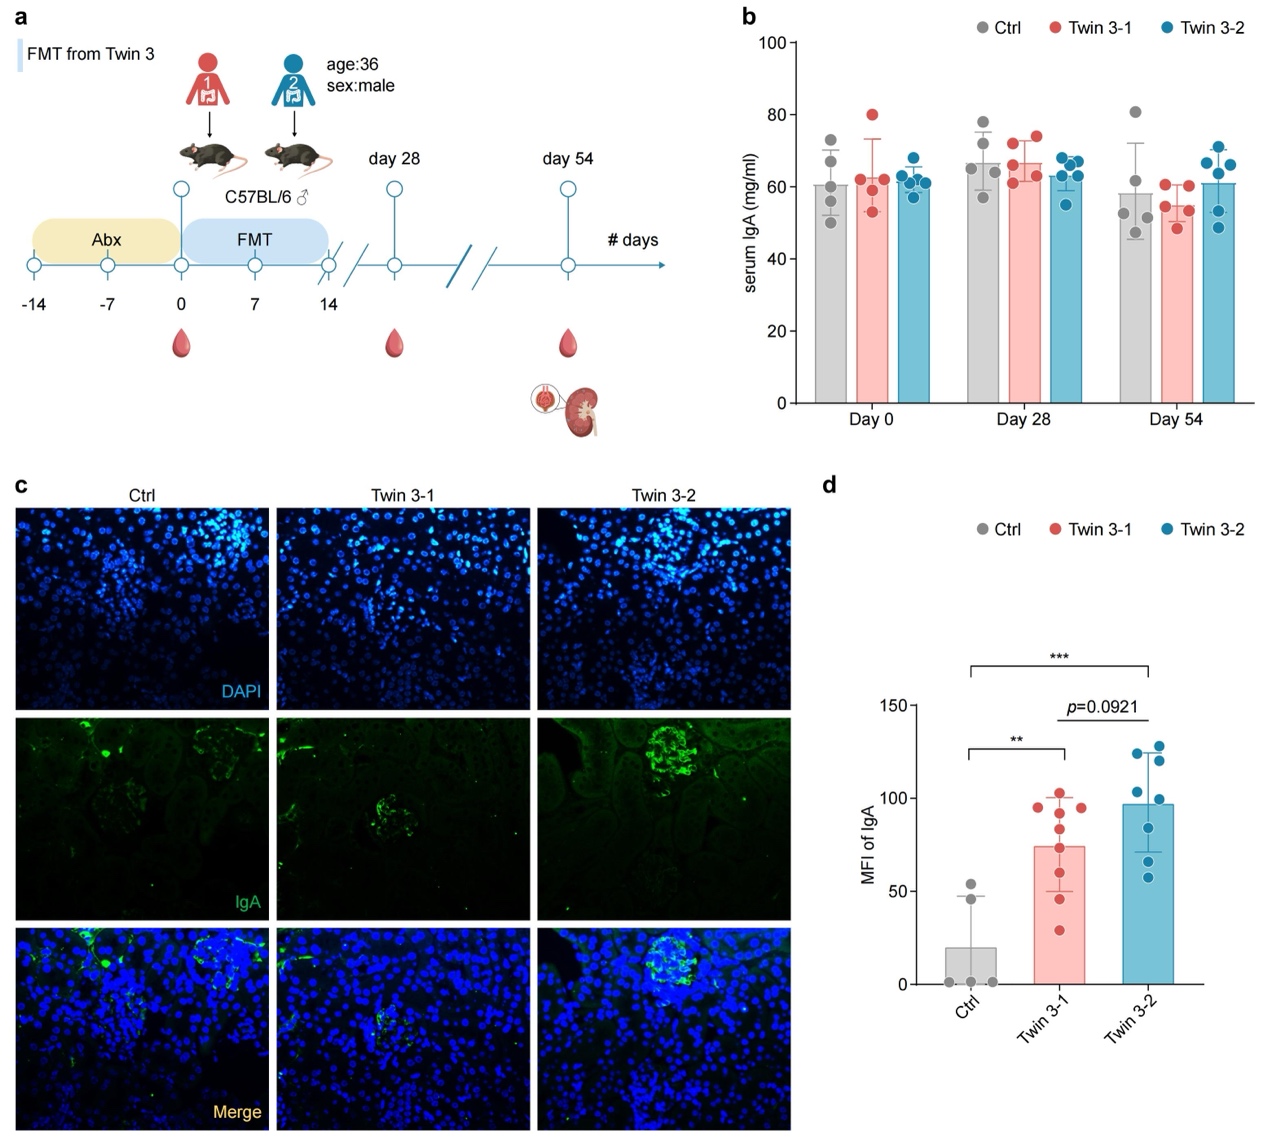
**

**Extended Data Fig. 3| Transplantation of fecal sample with high abundance *A. muciniphila* induces IgA kidney deposition.** a, FMT using fresh fecal samples from Twin 3-1 with high abundance of *A. muciniphila* during his active disease phase and his healthy sibling Twin 3-2 into C57BL/6 mice. The number of mice in five in Ctrl and Twin 3-2 group, six in Twin 3-1 group. b, Serum IgA concentrations were measured longitudinally post-FMT. c, Representative immunofluorescence images of kidney IgA deposition and corresponding semi-quantitative scoring at Day 54. Unpaired *t*-test has been used to analyze the significant differences between the groups. The error bars are represented as Mean ± SD. FMT: fecal microbiota transplantation; MFI: mean fluorescence intensity.

**
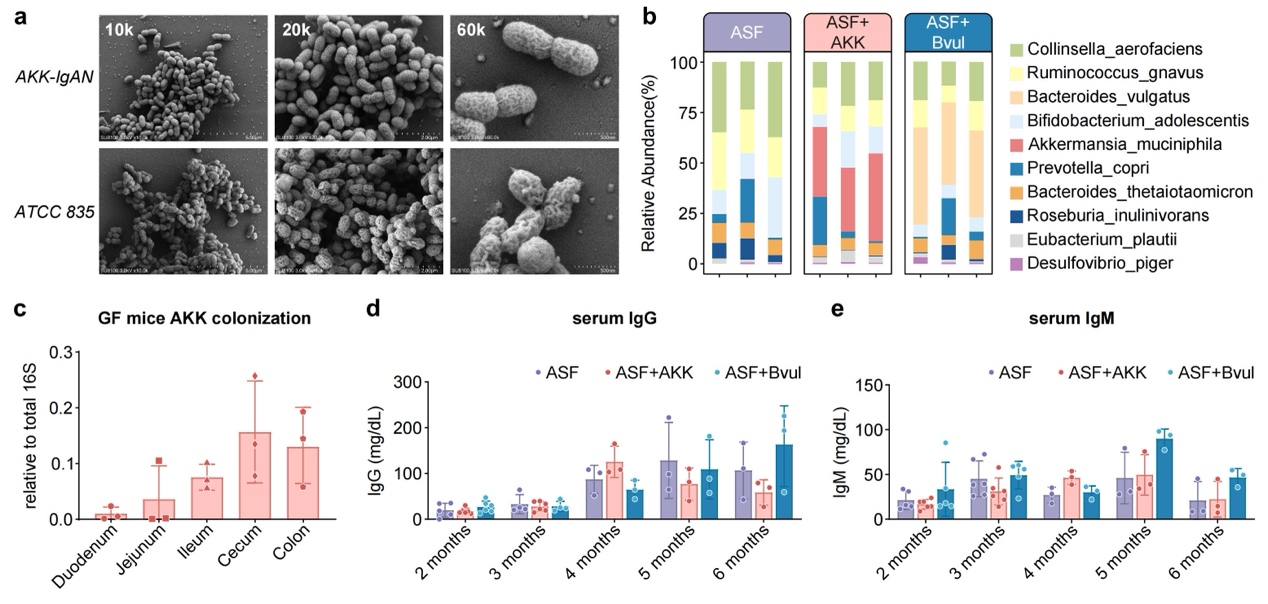
**

**Extended Data Fig. 4| The isolation and colonization of patient-derived *A. muciniphila*.** a, Scanning electron microscope shows difference in molecular surface of the two *A. muciniphila*. b, 16S rRNA sequencing results of the fecal microbiota after colonization. c, Intestinal colonization of *A. muciniphila* detected by real-time qPCR. d-e, Serum IgG and IgM concentrations were measured longitudinally post-colonization. Unpaired *t*-test has been used to analyze the significant differences between the groups. The error bars are represented as Mean ± SD. AKK-IgAN: *A. muciniphila* isolated and characterized from IgAN patient; ASF: Altered Schaedler Flora; ASF+AKK: ASF + *A. muciniphila*; ASF+Bvul: ASF + *B. vulgatus*.

**
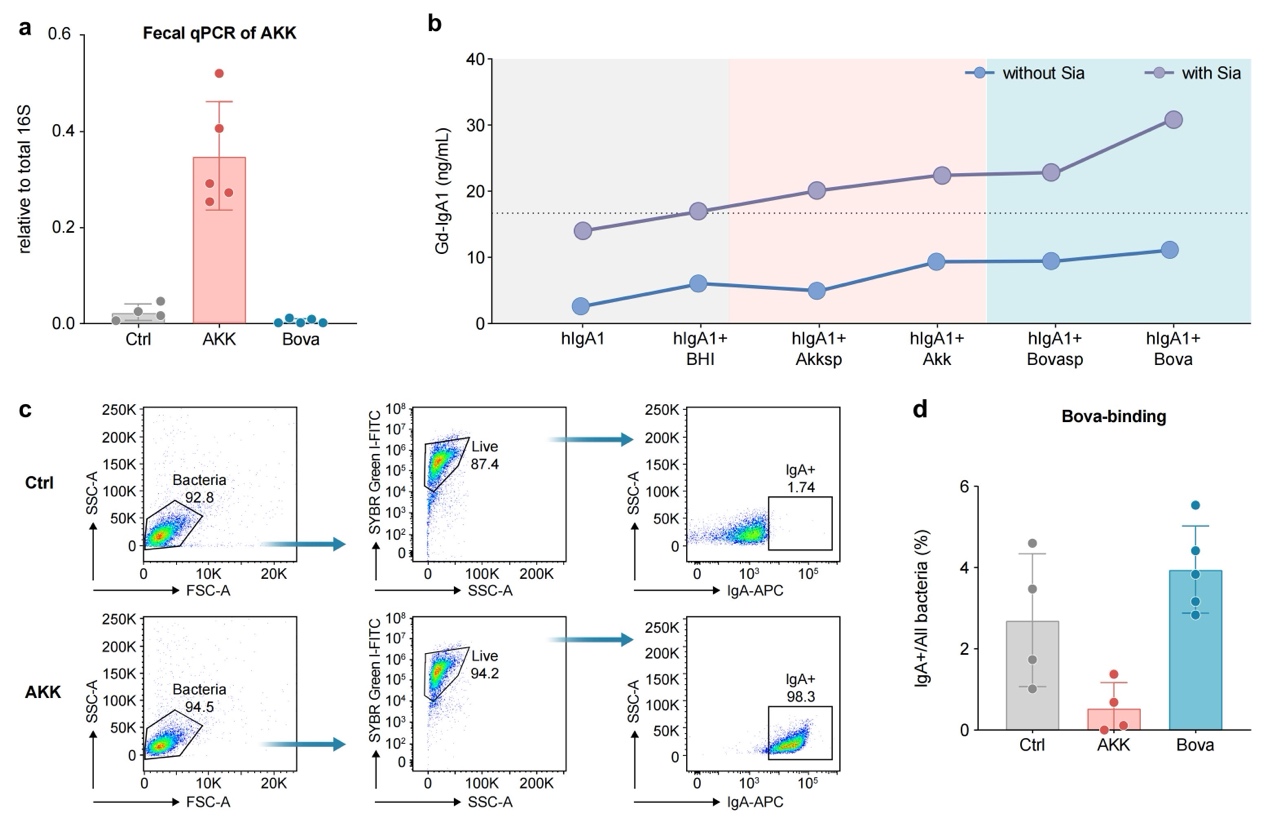
**

**Extended Data Fig. 5| Patient-isolated *A. muciniphila* promotes IgA renal deposition byinducing Akkermansia-mesangial cell cross-reactive IgA response.** a, Colonization verification by fecal 16S rDNA sequencing using bacterium-specific primers. b, *A. muciniphila* confirmed partial generation of Gd-IgA1, but the control strain Bova demonstrated even stronger deglycosylation activity. Recombinant human IgA1 (hIgA1; 1 μg) was incubated in a total volume of 200 μL containing 0.1 M Tris-HCl buffer (pH 5.0), culture supernatant from *A. muciniphila*, and sialidase (Sia; Sialidase treatment was included to facilitate exposure of *O*-glycan structures on IgA1). Specifically, the reaction mixture consisted of 1 μL hIgA1, 100 μL Tris-HCl buffer, 98 μL *A. muciniphila* culture supernatant, and 1 μL sialidase (5 U per 500 μL). The mixture was incubated at 37°C overnight. Following incubation, samples were centrifuged at 12,000 rpm for 1 min at 4°C to remove insoluble material. The supernatant was collected and Gd-IgA1 levels were quantified using a Gd-IgA1 ELISA according to the manufacturer’s instructions. c, Bacterial FACS gating strategy, the serum IgA from *A. muciniphila*-colonized mice was bind by cultured *A. muciniphila* and detected by flow cytometry. d, IgA induced by Bova tends to preferentially bind Bova. hIgA1: purified human IgA1 protein. Gd-IgA1: Galactose-deficient hIgA1. BHI: brain-heart medium. AKKsp: cultured *A. municiphila* supernatant. Bovasp: cultured *B.ovatus* supernatant. Sia: Sialidase.

**
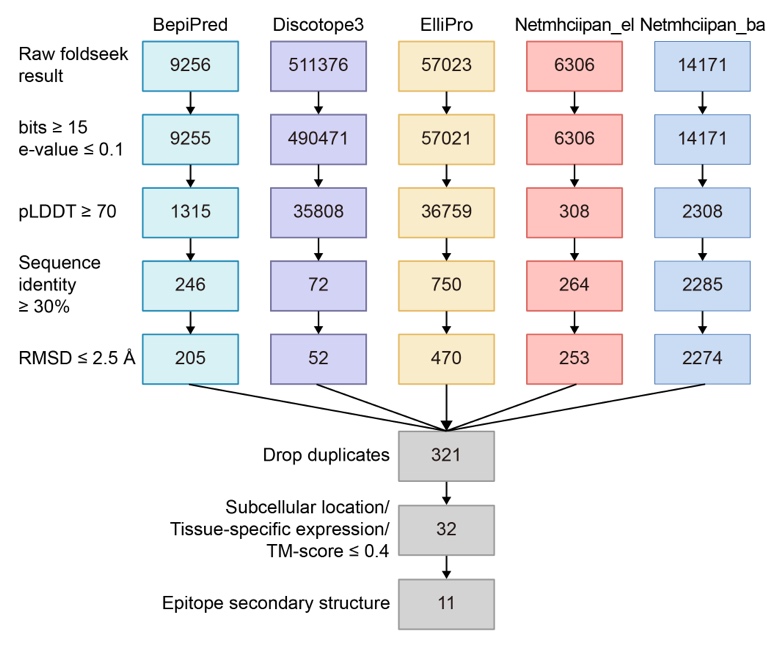
**

**Extended Data Fig. 6| Structural simulation screening process for *A. muciniphila* and mesangial proteins.** A total of 11 high-confidence mimicry pairs involving 10 distinct *A. muciniphila* antigen proteins and 9 mesangial proteins were identified.

**
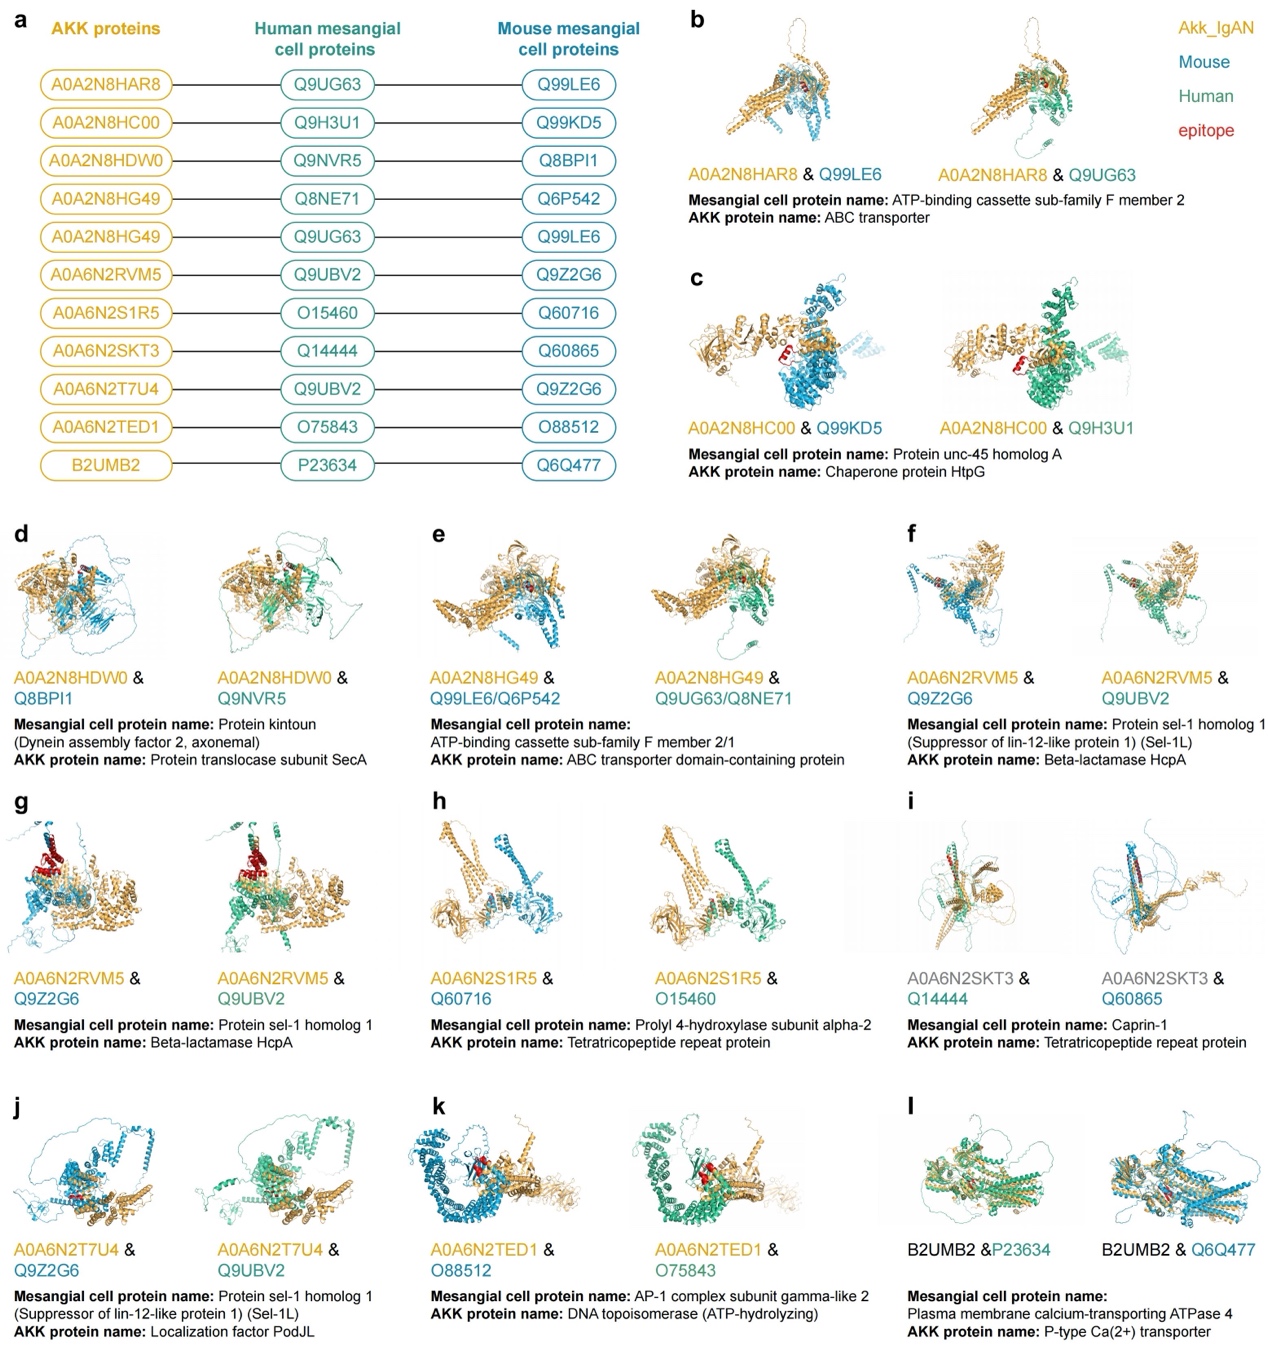
**

**Extended Data Fig. 7| The structural alignments of the 11 high-confidence mimicry pairs.**

**
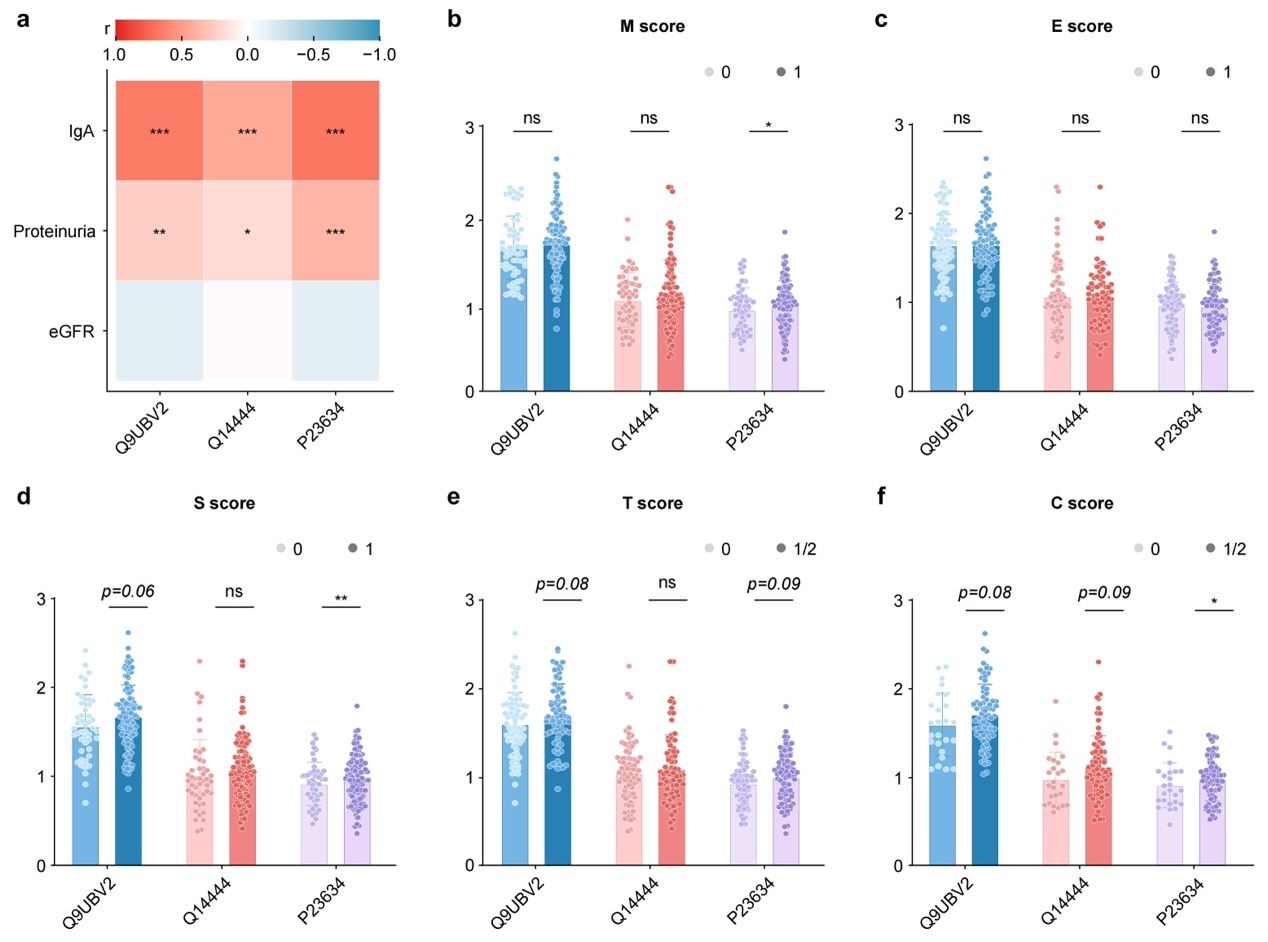
**

**Extended Data Fig. 8| Associations between anti-Q9UBV2, anti-Q14444, and anti-P23634 IgA and clinical-pathological phenotypes.** a, Clinico-pathological correlation analyses revealed that elevated anti-Q9UBV2, anti-Q14444, and anti-P23634 IgA levels were significantly associated with higher proteinuria; b-f, anti- P23634 IgA levels were more likely to be associated with pathologic lesions mesangial hypercellularity (“M”), segmental glomerulosclerosis (“S”), and cellular or fibrocellular crescents (“C”) scores.

**
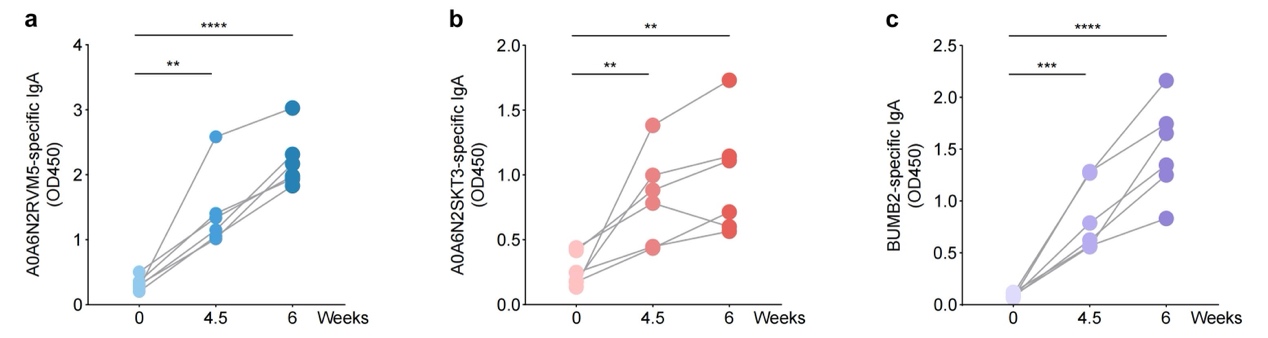
**

**Extended Data Fig. 9| The IgA antibody titers against the immunized proteins.**

**
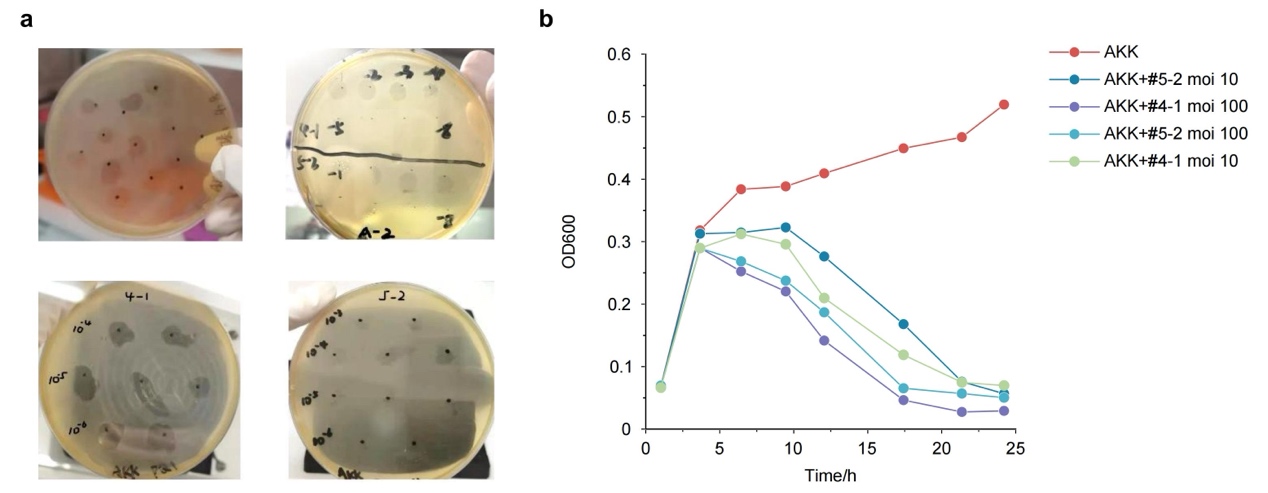
**

**Extended Data Fig. 10| Isolation of two *A. muciniphila*-specific lytic bacteriophages from environmental sources.** a, Phages isolated from experimental samples (#4-1 and #5-2). b, Phages lysis efficiency test against *A. muciniphila* isolated from the IgA nephropathy patient. moi: multiplicity of infection.

**
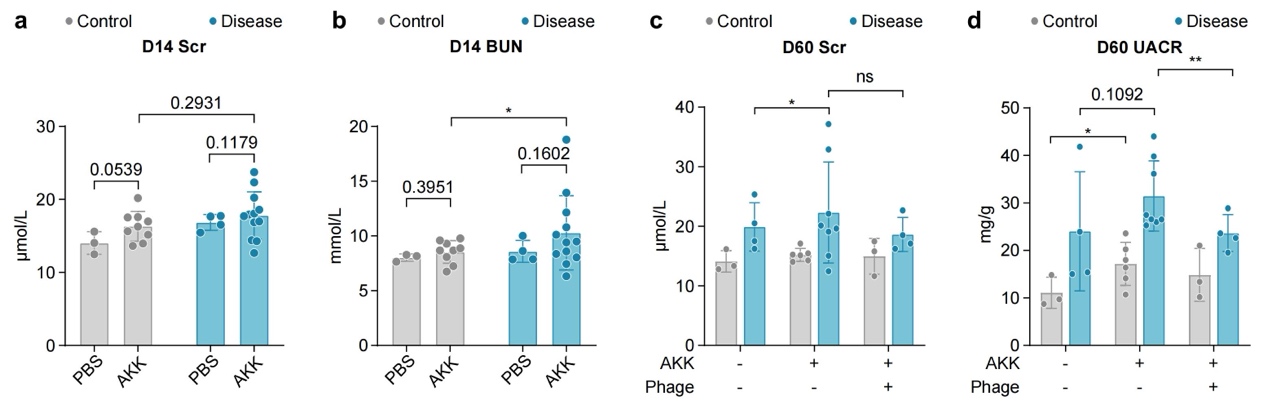
**

**Extended Data Fig. 11| Phage treatment ameliorated the IgAN phenotypes induced by *A. muciniphila* in LCWE stimulated humanized IgA1 mouse model.** a-b, The effects of *A. muciniphila* colonization on serum creatinine and BUN changes. c-d, The bacteriophage treatment ameliorated IgAN phenotypes measured at day 60, as demonstrated by the significant decrease of urine albumin to creatinine ratio (UACR), with minor effect on serum creatinine. Unpaired *t*-test has been used to analyze the significant differences between the groups. The error bars are represented as Mean ± SD.

**
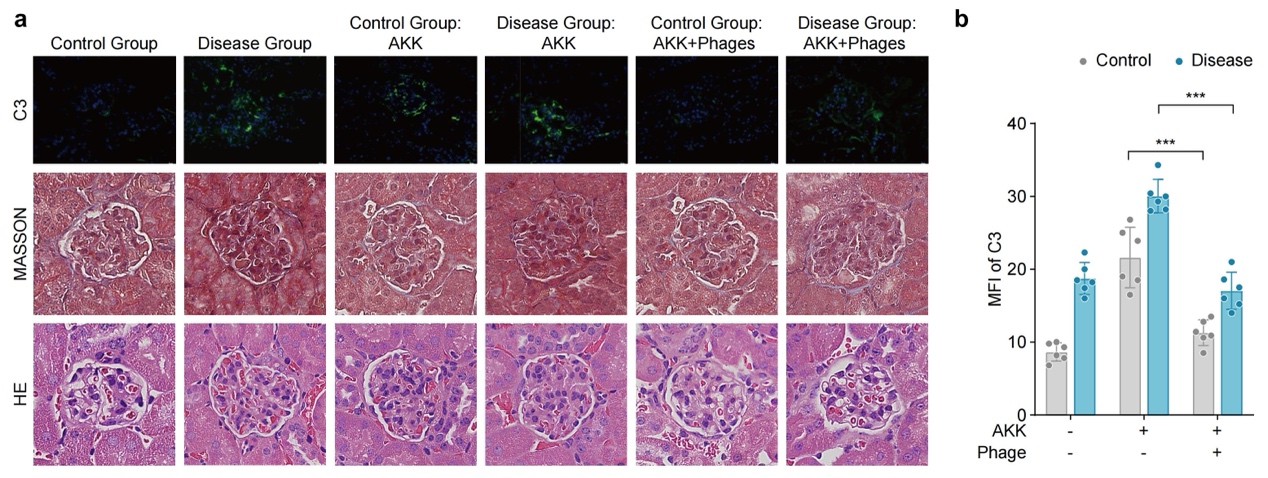
**

**Extended Data Fig. 12| Phage treatment ameliorated the IgAN phenotypes induced by *A. muciniphila* in LCWE stimulated humanized IgA1 mouse model.** Representative images and quantification of renal C3 deposition by immunofluorescence at day 60. A clear amelioration of IgAN in pathological examination was observed. Unpaired *t*-test has been used to analyze the significant differences between the groups. The error bars are represented as Mean ± SD. C3: complement component 3; HE: Hematoxylin-Eosin.
